# Supplementary material for: The influence of π-conjugation on competitive pathways: charge transfer or electron transfer in new D–π–A and D–π–Si–π–A dyads
Source: Royal Society of Chemistry journal article supplement (doi:10.1039/c6cp03259a), 2016-01-01
Supplement: c6cp03259a1.pdf [file c6cp03259a1.pdf]

## Electronic Supplementary Information

### The influence of $\pi$ -conjugation on competitive pathways: Charge transfer or electron transfer in new D- $\pi$ -A and D- $\pi$ -Si- $\pi$ -A dyads

Yang-Jin Cho,<sup>a</sup> Ah-Rang Lee,<sup>b</sup> So-Yoen Kim,<sup>a</sup> Minji Cho,<sup>a</sup> Won-Sik Han,<sup>b\*</sup> Ho-Jin Son,<sup>a</sup> Dae Won Cho<sup>a,c\*</sup> and Sang Ook Kang<sup>a\*</sup>

<sup>a</sup> Department of Advanced Materials Chemistry, Korea University (Sejong), Sejong, 30019, South Korea. E-mails: [hjson@korea.ac.kr](mailto:hjson@korea.ac.kr) and [sangok@korea.ac.kr](mailto:sangok@korea.ac.kr)

<sup>b</sup> Department of Chemistry, Seoul Women's University, Seoul, 01797, South Korea. E-mails: [wshan@swu.ac.kr](mailto:wshan@swu.ac.kr)

<sup>c</sup> Center for Photovoltaic Materials, Korea University (Sejong), Sejong, 30019, South Korea. E-mail: [dwcho@korea.ac.kr](mailto:dwcho@korea.ac.kr)

#### TABLE

**Table S1.** Energies (eV) of orbitals calculated by B2LYP/6-31G(d,p) for dyads 1 and 2.

|      | dyad 1 | dyad 2 |
|------|--------|--------|
| L+2  | -0.899 | -0.733 |
| L+1  | -1.859 | -1.829 |
| LUMO | -1.990 | -1.890 |
| HOMO | -5.370 | -5.375 |
| H-1  | -5.778 | -5.756 |
| H-2  | -6.385 | -6.631 |

#### Figures

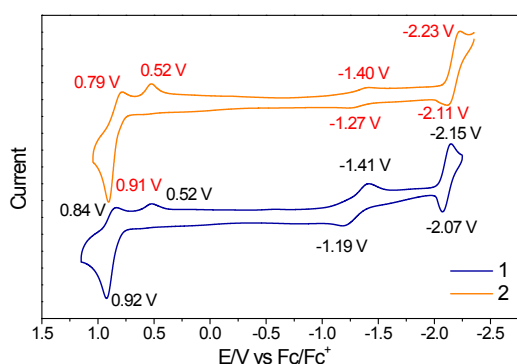

**Fig. S1.** Cyclic voltammograms of dyads 1 and 2.

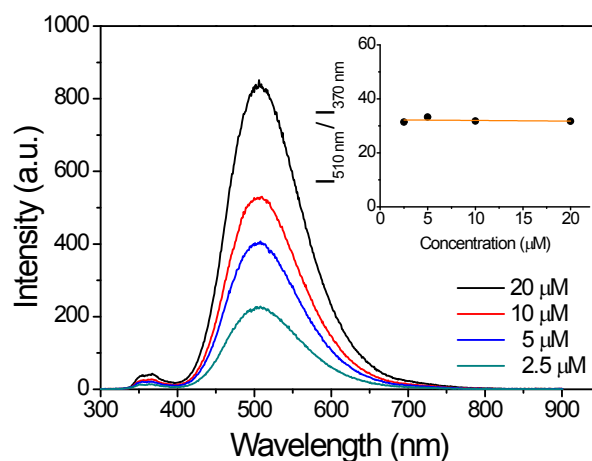

**Fig. S2.** Dependence of concentration on emission spectra of dyad 2 (2.5–20  $\mu$ M) in  $\text{CH}_2\text{Cl}_2$ .  $\lambda_{\text{ex}} = 270 \text{ nm}$ . Inset shows the ratio of the emission intensities ( $I_{510 \text{ nm}}/I_{370 \text{ nm}}$ ).

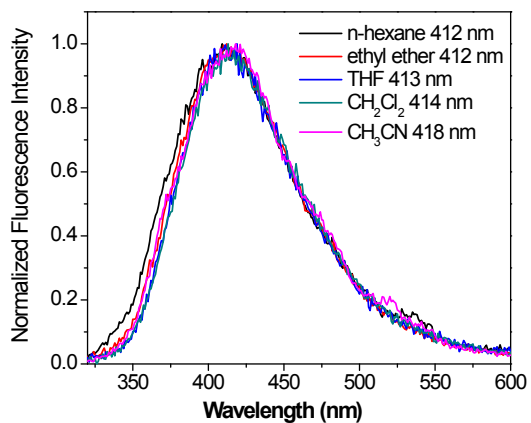

Fig. S3. Emission spectra of triphenyl triazine in various solvents.  $\lambda_{\text{ex}} = 270$  nm.
